# Supplementary material
Source: publisher figshare collection journal article supplement (https://tandf.figshare.com/ndownloader/files/15557681)

Figure S1. Effects of long-term fertilization on soil water retention. Bars represent means±standard error. Different lowercase letters in table indicate significant differences among treatments (*p* < 0.05).


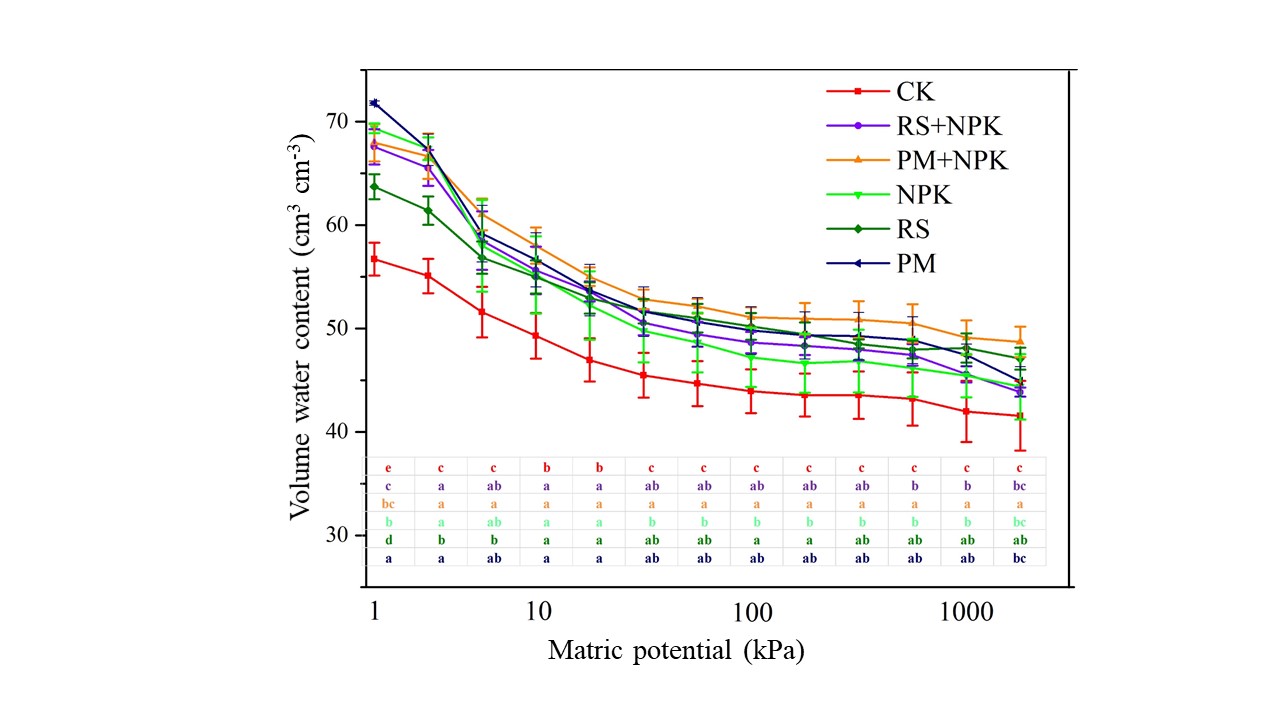

Supplement: Supplementary file 1 [file 15557681]
